# Supplementary material for: The Structures and Bonding of Bismuth-Doped Boron Clusters: BiB4− and BiB5−
Source: MDPI journal article supplement (doi:10.3390/inorganics11100405), 2023-10-14
Supplement: s1 [file s1]

# Supplementary Information

## **The Structures and Bonding of Bismuth-Doped Boron Clusters: $\text{BiB}_4^-$ and $\text{BiB}_5^-$**

Hyun Wook Choi, Wei-Jia Chen, G. Stephen Kocheril, Dao-Fu Yuan\*, and Lai-Sheng Wang\*

Department of Chemistry, Brown University, 324 Brook Street, Providence, Rhode Island 02912, USA

Emails: Lai-Sheng\_Wang@brown.edu (L.S.W.); ydfu@ustc.edu.cn

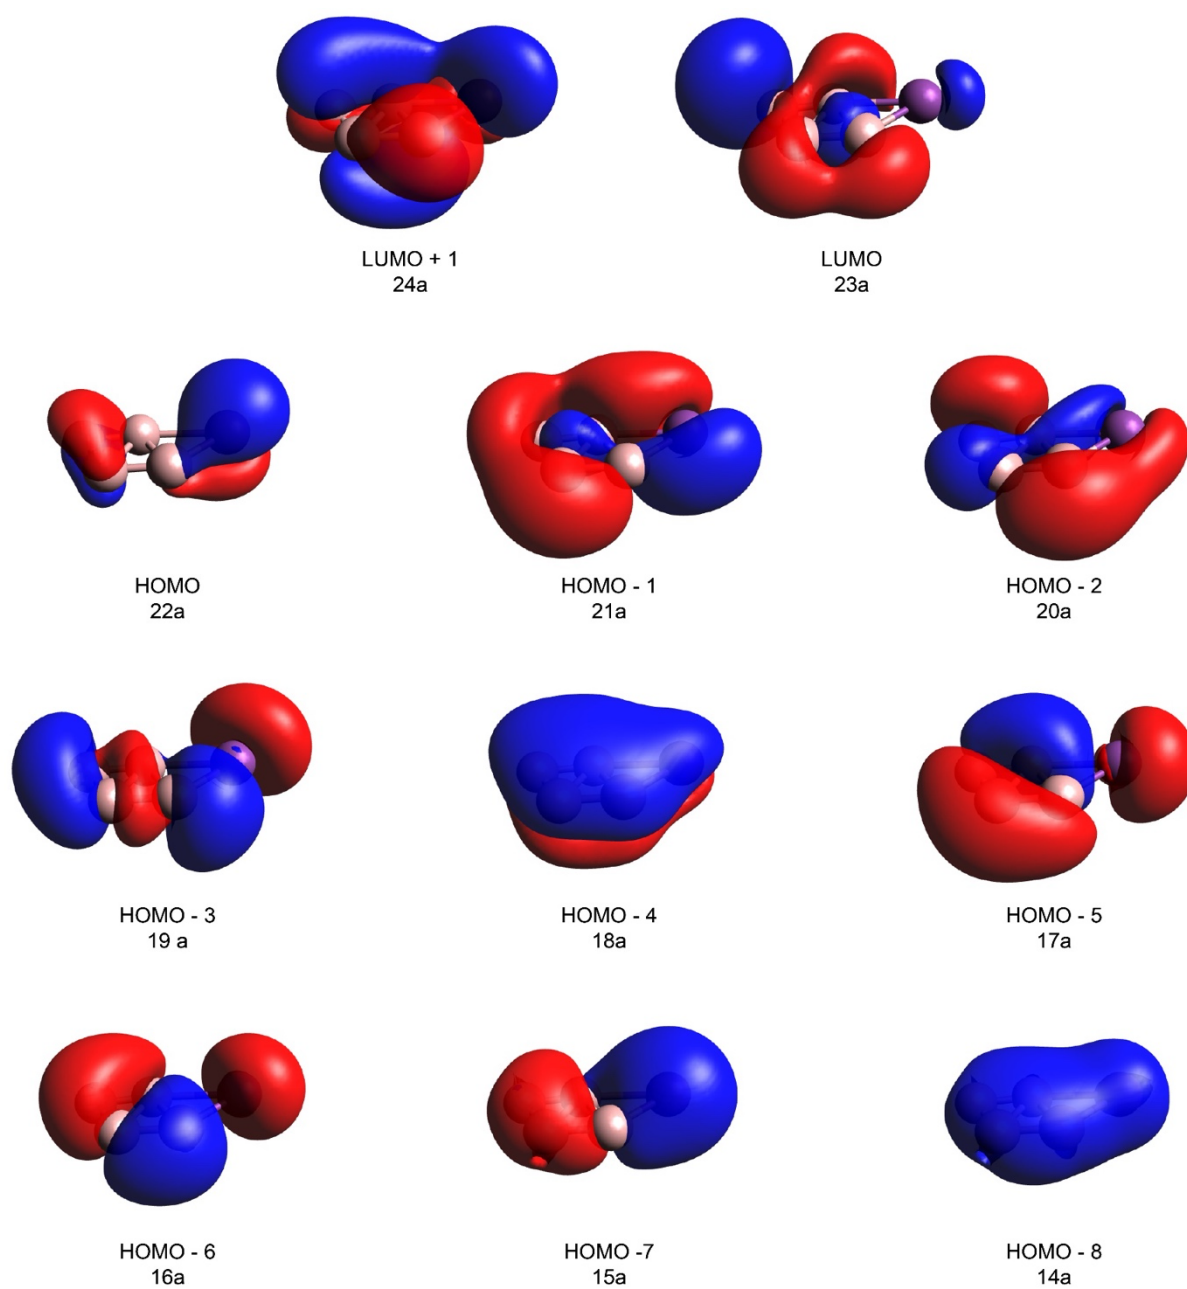

Fig. S1. The valence MOs of the global minimum of  $\text{BiB}_4^-$  ( $C_{1v}$ ,  $^1A_1$ ).

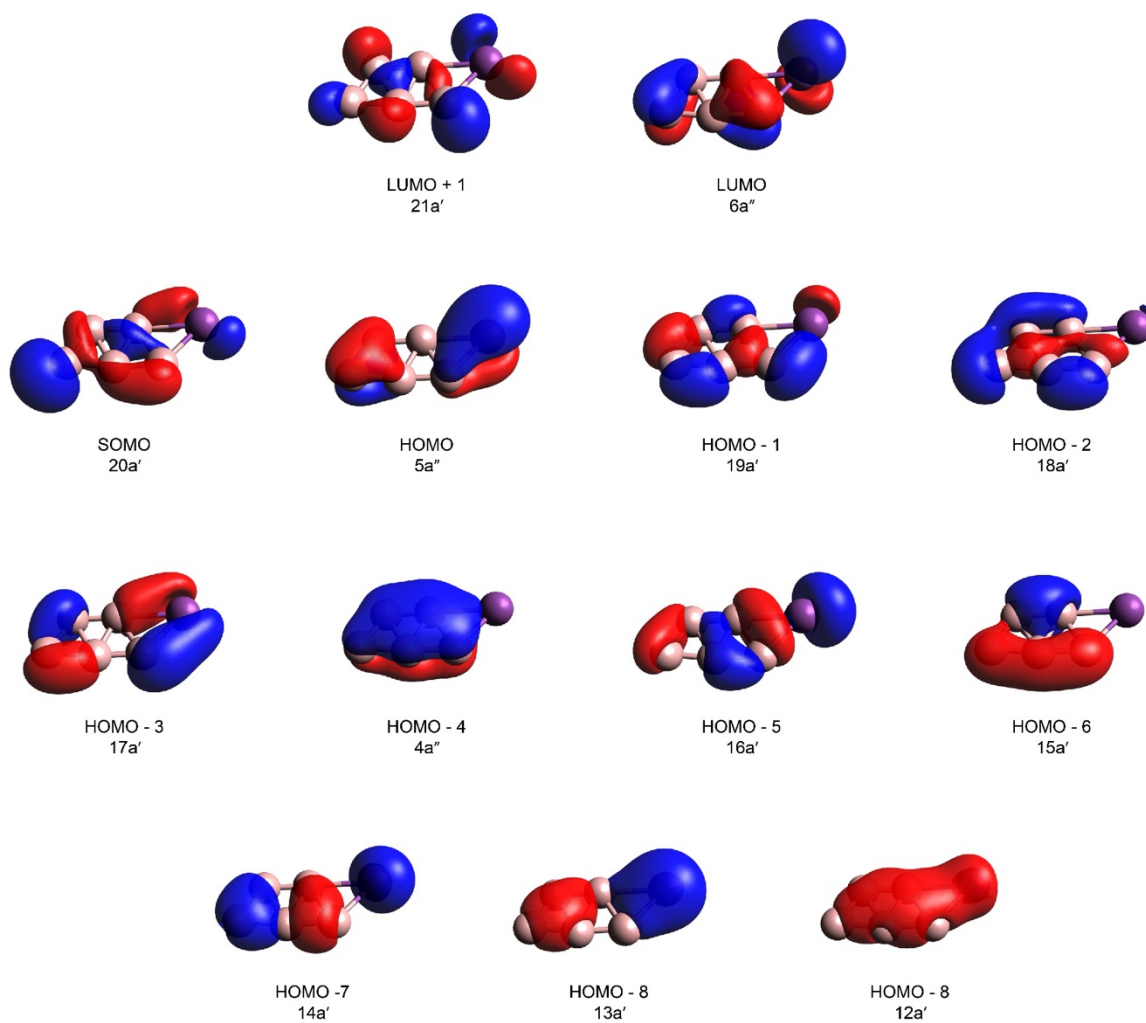

Fig. S2. The valence MOs of the global minimum of  $\text{BiB}_5^-$  ( $C_s$ ,  $^2A'$ ).

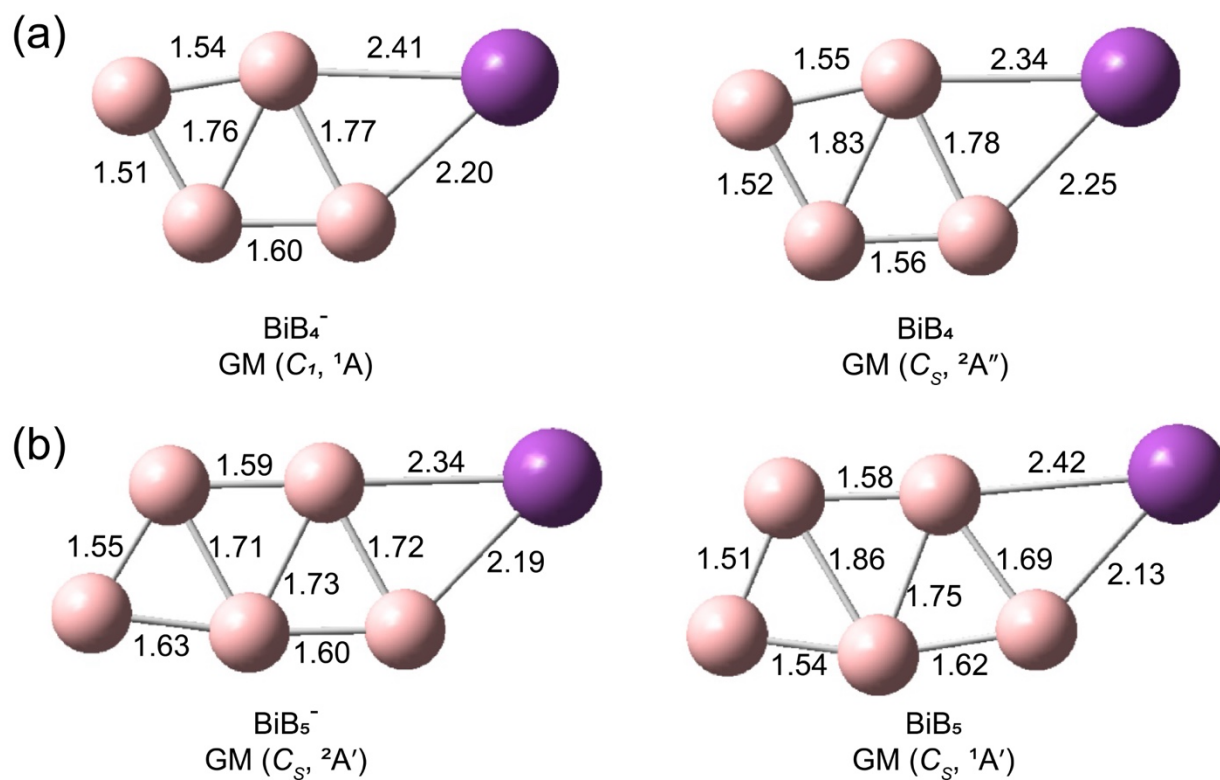

Fig. S3. The bond lengths (in Å) for (a) the ground state of BiB<sub>4</sub><sup>-</sup> ( $C_1$ ,  $^1A$ ) and BiB<sub>4</sub> ( $C_s$ ,  $^2A''$ ) and (b) the ground state of BiB<sub>5</sub><sup>-</sup> ( $C_s$ ,  $^2A'$ ) and BiB<sub>5</sub> ( $C_s$ ,  $^1A'$ ).
